# Supplementary material for: Development and Validation of the Organizational Cultural Values Scale for Senior Healthcare Executives in Chinese Hospitals
Source: Research Square preprint supplement (doi:10.21203/rs.3.rs-7309689/v1), 2025-09-03
Supplement: Supplementary file 1 [file 9df4c497c4d639ffe5695bfd.docx]

**The Organizational Cultural Values Scale for Senior Healthcare Executives in Chinese Hospitals**

| ****Tier 1 Indicators**** | ****Tier 2 Indicators**** | ****Tier 3 Indicators**** |
| --- | --- | --- |
| **A. Humanistic care** | **A1 Humanistic spirit** | A1.1 Establishment of academy training with cultural characteristics of our hospital |
| A1.2 Organization and propaganda of medical humanistic spirit in hospital |
| **A2 Humanistic Literacy** | A2.1 Humanitarian, honest, altruistic spirit |
| A2.2 Willingness to study philosophy, psychology, ethics and other basic humanities and attend related lectures |
| **A3 Humanistic system** | A3.1 Develop specific human care goals and measures |
| A3.2 Establishing quantitative humanistic indicators and evaluation system |
| A3.3 Establish a sound system of humanistic care |
| **A4 Human Environment** | A4.1 Focus on the survival and development needs of hospital staff |
| A4.2 Ensure that all patients are treated equally |
| A4.3 Set up a warm reminder and many convenient services in the hospital |
| **B. Medical ethics** | **B1 Medical ethics review system** | B1.1 Obtain informed consent from subjects and conduct benefit/cost assessment |
| B1.2 Medical ethics training for all personnel involved in clinical trial projects |
| B1.3 Whether our hospital has ' Helsinki Declaration ' and other norms of medical ethics system |
| **B2 Medical ethics and medical style construction** | B2.1 Medical staff conduct dignified, caring for patients, civilized service terminology, good service attitude |
| B2.2 Medical staff love their work, work a sense of responsibility, have a rigorous work attitude, due diligence to do their job |
| B2.3 There are clear rules and regulations that strictly prohibit medical staff from soliciting or accepting red envelopes from patients and their relatives and friends, etc. |
| B2.4 Strictly implement medical services and drug pricing policies, not overcharging, charging indiscriminately and collecting fees privately |
| B2.5 Actively organize medical staff to participate in social welfare medical activities such as poverty alleviation, medical consultation, helping the disabled and supporting agriculture |
| B2.6 Improve the disciplinary system for medical staff violations |
| **B3 Humanitarian** | B3.1 Respect for patients' lives |
| B3.2 Respect for patients' rights |
| B3.3 Respect for the patient's personality |
| B3.4 Eliminate or minimize the suffering caused by the disease to the patient |
| **C. Risk awareness** | **C1 Risk monitoring and early warning awareness** | C1.1 Establish "five early" awareness actions: early detection, early identification, early warning, early reporting, early processing |
|  | C1.2 Mechanism and procedure with rational risk assessment and scientific decision |
|  | C1.3 Timely risk assessment and professional risk communication |
| **C2 Risk decision-making consciousness** | C2.1 Implementing risk decision and management system |
|  | C2.2 Take charge without shifting the blame and avoiding risks |
|  | C2.3 Improve risk resolution organization and mechanism arrangement |
| **C3 Consciousness of Handling Medical Emergencies** | C3.1 Take effective measures to reasonably handle medical adverse events |
|  | C3.2 Construction of whole staff training mechanism to create patient safety culture atmosphere |
|  | C3.3 Implementation of adverse event handling feedback and continuous improvement mechanism |
| **C4 Learning optimization awareness** | C4.1 Responsibility caused after taking risks |
|  | C4.2 Whether to hold seminars, write research reports, etc. after risk |
| **D. Patient safety** | **D1 Medical Safety Guarantee** | D1.1 Establishing an internal reporting system for non-punitive adverse events |
| D1.2 Implement medical safety system and improve the overall safety awareness of the hospital |
| **D2 Patient-centered** | D2.1 Proactively invite patients and their families to participate in the entire treatment planning process |
| D2.2 Patient satisfaction evaluation |
| D2.3 Establishing patient-centered institutional safeguards |
